# Supplementary material for: Fabrication of nanocrystalline λ-Ti3O5with tunable terahertz wave transmission properties across a temperature induced phase transition
Source: Royal Society of Chemistry journal article supplement (doi:10.1039/c6tc03108k), 2016-01-01
Supplement: c6tc03108k1.pdf [file c6tc03108k1.pdf]

**Supplementary information for: Fabrication of nanocrystalline  $\lambda$ -Ti<sub>3</sub>O<sub>5</sub> with tunable terahertz wave transmission properties across a temperature induced phase transition**

Qiwu Shi,<sup>a</sup> Guoqing Chai,<sup>a</sup> Wanxia Huang,<sup>\*,a</sup> Yanli Shi,<sup>b</sup> Bo Huang,<sup>a</sup> Dan Wei,<sup>a</sup> Jianqi Qi,<sup>b</sup> Fuhai Su,<sup>c</sup> Wen Xu,<sup>c</sup> and Tiecheng Lu<sup>\*,b</sup>

<sup>a</sup> College of Materials Science and Engineering, Sichuan University, Chengdu 610065, China

<sup>b</sup> College of Physical Science and Technology, Sichuan University, Chengdu 610065, China

<sup>c</sup> Key Lab of Materials Physics, Institute of Solid State Physics, Chinese Academy of Sciences, Hefei 230031, China

**Corresponding Authors**

\* E-mail: huangwanxia@scu.edu.cn. Tel/Fax: +86-28-8540-5781.

\* E-mail: tiechenglu@126.com. Tel/Fax: +86-28-8541-8586.

## Description of a heating cell used in the THz time domain spectroscopy (THz-TDS) system

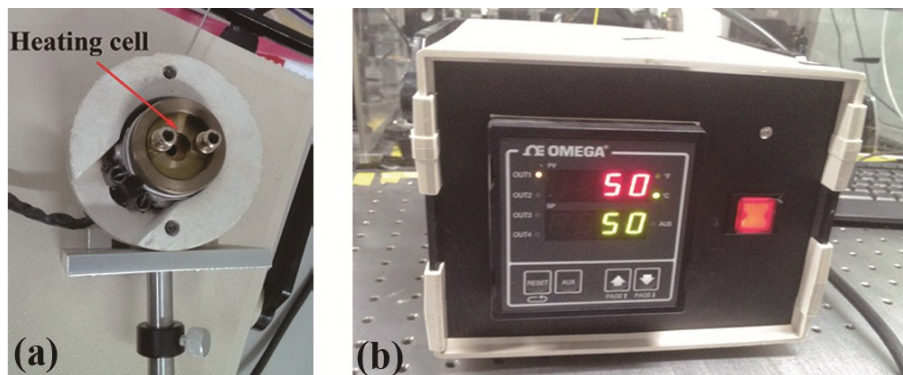

**Fig. S1** A designed heating cell incorporated in the THz time-domain spectroscopy system: (a) sample holder with heating stage, and (b) temperature controller.

The THz transmission characteristics of the  $\lambda$ -Ti<sub>3</sub>O<sub>5</sub> during the temperature induced phase transition was investigated using a THz time domain spectroscopy (THz-TDS) system. A heating cell was employed to realize the temperature controlling. It is comprised of a sample holder with heating stage (Fig. S1(a)) and a temperature controller (Fig. S1(b))

## Morphology of the raw material of nano-TiO<sub>2</sub> powder

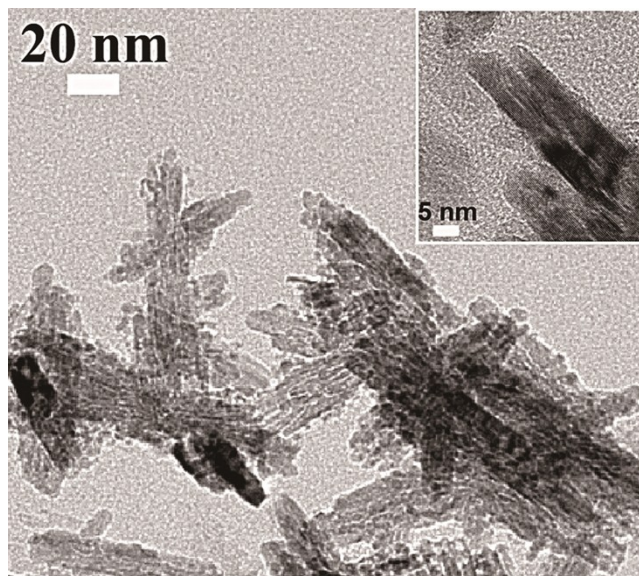

**Fig. S2** TEM morphology of the unmodified nano-TiO<sub>2</sub>. Inset: HRTEM morphology of the TiO<sub>2</sub>.

**XRD profiles of the titanium oxides annealed from unmodified nano-TiO<sub>2</sub> at different temperatures**

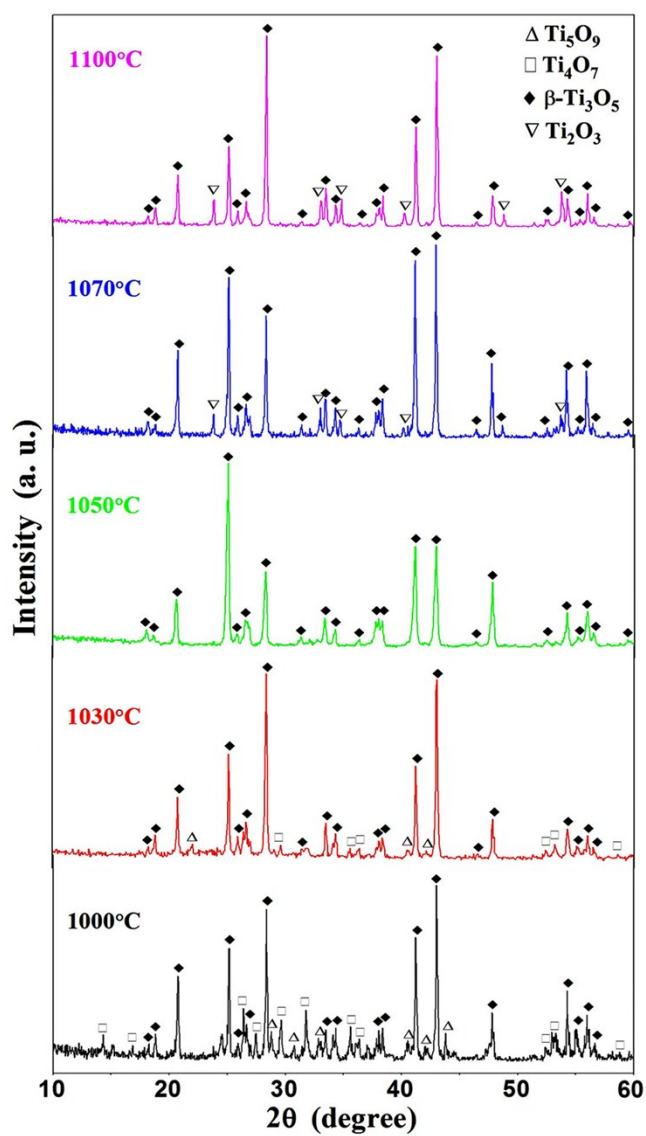

**Fig. S3** XRD profiles of the samples annealed from unmodified nano-TiO<sub>2</sub> at temperature ranging from 1000 °C to 1100 °C.

**Morphology of the  $\beta$ -Ti<sub>3</sub>O<sub>5</sub> obtained by carbothermal reduction of nano-TiO<sub>2</sub> at annealing temperature of 1050 °C**

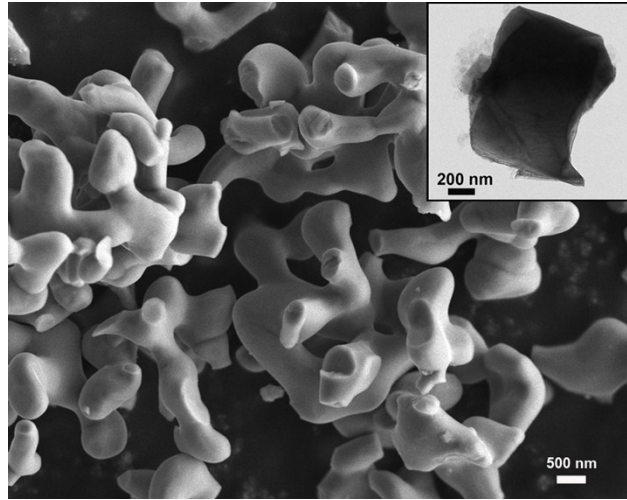

**Fig. S4** FE-SEM and TEM (inset) morphology of the  $\beta$ -Ti<sub>3</sub>O<sub>5</sub>.

**Change of resistance for the  $\lambda$ -Ti<sub>3</sub>O<sub>5</sub> during the temperature induced phase transition**

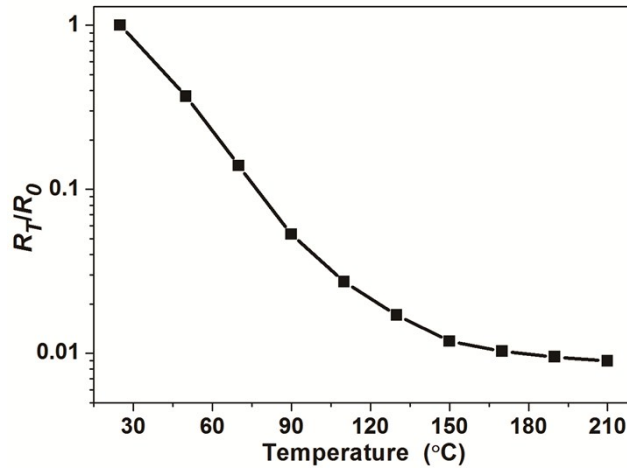

**Fig. S5**  $R/R_0$  versus temperature for the  $\lambda$ -Ti<sub>3</sub>O<sub>5</sub> in the temperature ranging from 25 °C to 210 °C

The  $\lambda$ -Ti<sub>3</sub>O<sub>5</sub> powder was pressed at 200 MPa for 5 minutes to form a compact disk with diameter of 12 mm and thickness of 3 mm. Then the resistance of the sample was measured using the conventional four-point probe method, combined with an electrically heated substrate

holder.  $R/R_0$  was recorded to determine the change of resistance during the temperature induced phase transition, where  $R_0$  represents the resistance of the sample at room temperature (25 °C) and  $R_T$  represents the measured resistance upon heating. Fig. S5 shows that the  $R/R_0$  decreases continuously in the temperature ranging from 25 °C to 210 °C. It corresponds to the  $\lambda$ -Ti<sub>3</sub>O<sub>5</sub> to  $\alpha$ -Ti<sub>3</sub>O<sub>5</sub> transition. And it indicates that the resistance of the  $\lambda$ -Ti<sub>3</sub>O<sub>5</sub> decreased around two orders of magnitude during this phase transition.

### Normalized THz frequency-domain spectra of the hybrid material containing $\lambda$ -Ti<sub>3</sub>O<sub>5</sub> upon heating and cooling

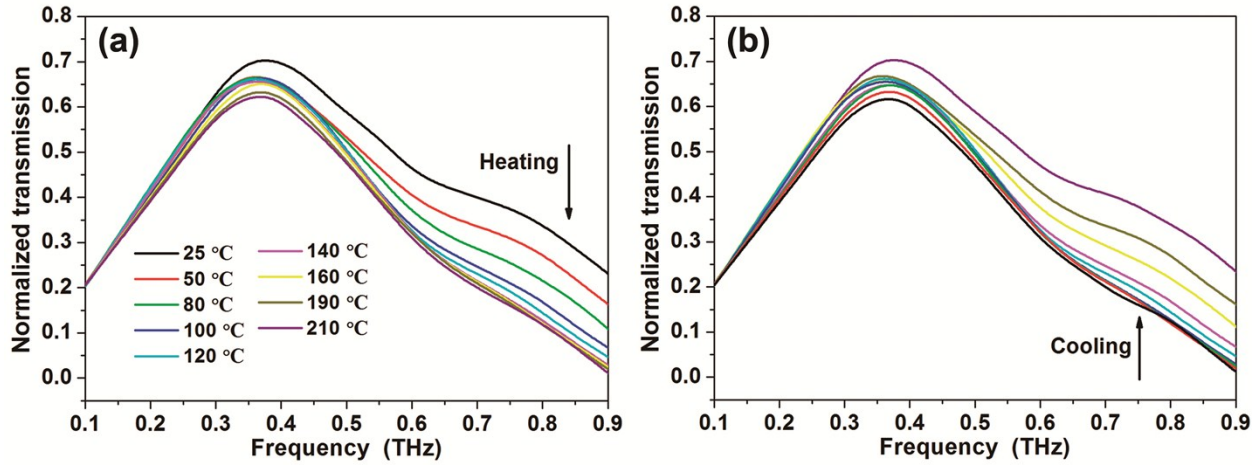

**Fig. S6** Normalized THz frequency-domain transmission spectra of the sample (a) heating from 25 °C to 210 °C and (b) cooling from 210 °C to 25 °C.

The THz frequency-domain spectra of the sample were obtained from fast Fourier transforming time-domain signals. And the transmission amplitude was normalized by comparing the THz transmission of the sample to the air. As shown in Fig. S6(a), the THz transmission amplitude decreases gradually during the heating process, corresponding to a temperature induced phase transition from  $\lambda$ -Ti<sub>3</sub>O<sub>5</sub> to  $\alpha$ -Ti<sub>3</sub>O<sub>5</sub>. And Fig. S6(b) shows that the THz transmission amplitude increases and recovers to the initial state during the cooling process, which corresponds to the phase recovery from  $\alpha$ -Ti<sub>3</sub>O<sub>5</sub> to  $\lambda$ -Ti<sub>3</sub>O<sub>5</sub>.

## Temperature induced phase transition characteristic of $\lambda$ - $\text{Ti}_3\text{O}_5$ studied using Differential scanning calorimetry (DSC)

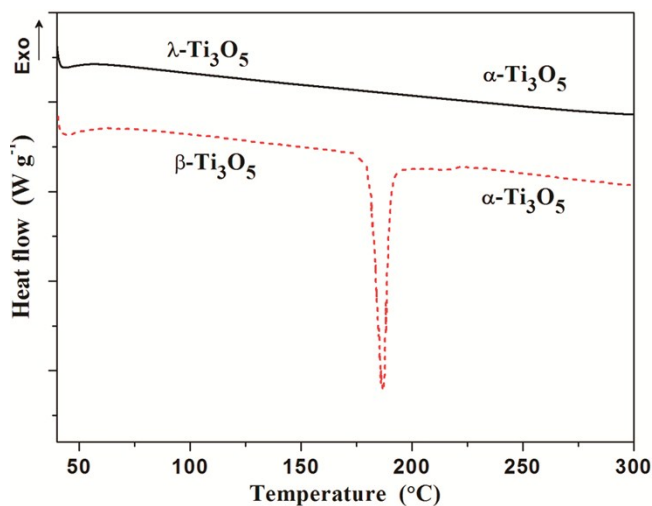

**Fig. S7** DSC curves of the  $\lambda$ - $\text{Ti}_3\text{O}_5$  and  $\beta$ - $\text{Ti}_3\text{O}_5$  with increasing temperature.

As shown in Fig. S7, DSC curve of the  $\beta$ - $\text{Ti}_3\text{O}_5$  with increasing temperature exhibits an obvious exothermic peak. It has been demonstrated that this exothermic peak corresponded to the first-order phase transition from  $\beta$ - $\text{Ti}_3\text{O}_5$  to  $\alpha$ - $\text{Ti}_3\text{O}_5$ .<sup>1</sup> By contrast, there is not any exothermic peak emerged for the  $\lambda$ - $\text{Ti}_3\text{O}_5$  with increasing temperature. Our results are consistent with previous report. It was proposed that the temperature induced phase transition from  $\lambda$ - $\text{Ti}_3\text{O}_5$  to  $\alpha$ - $\text{Ti}_3\text{O}_5$  was a typical second-order phase transition.

## REFERENCES

(1) Ohkoshi, S.; Tsunobuchi, Y.; Matsuda, T.; Hashimoto, K.; Namai, A.; Hakoe, F.; Tokoro, H. Synthesis of a metal oxide with a room-temperature photoreversible phase transition. *Nat. Chem.* **2010**, *2*, 539-545.
